# Supplementary material for: Multi-responsive, self-healing and adhesive PVA based hydrogels induced by the ultrafast complexation of Fe3+ ions
Source: Royal Society of Chemistry journal article supplement (doi:10.1039/c9sm01346f), 2019-01-01
Supplement: c9sm01346f1.pdf [file c9sm01346f1.pdf]

## Supporting Information

### **Multi-responsive, self-healing and adhesive PVA based hydrogels induced by the ultrafast complexation of Fe<sup>3+</sup> ions**

Jianfei Tie<sup>1</sup>, Hongchen Liu<sup>2</sup>, Jingchun Lv<sup>1</sup>, Bijia Wang<sup>1,3,4</sup>, Zhiping Mao<sup>1,4\*</sup>, Linping  
Zhang<sup>1,4</sup>, Yi Zhong<sup>1,4</sup>, Xueling Feng<sup>1,4</sup>, Xiaofeng Sui<sup>1,3,4</sup>, Hong Xu<sup>1,4\*</sup>

*1 Key Lab of Science and Technology of Eco-textile, Ministry of Education, College of Chemistry, Chemical Engineering and Biotechnology, Donghua University, Shanghai, 201620, People's Republic of China.*

*2 Textile college, Zhongyuan University of Technology, Zhengzhou 450007, Henan Province, People's Republic of China.*

*3 Key Lab of High Performance Fibers & Products, Ministry of Education, Donghua University, Shanghai, 201620, People's Republic of China.*

*4 Innovation Center for Textile Science and Technology of DHU, Donghua University, Shanghai, 201620, People's Republic of China.*

*\*Corresponding authors:*

*Address: No. 2999 North Renmin Road, Shanghai 201620, People's Republic of China.*

*E-mail: [hxu@dhu.edu.cn](mailto:hxu@dhu.edu.cn) (Hong Xu)*

*E-mail: [zhpmiao@dhu.edu.cn](mailto:zhpmiao@dhu.edu.cn) (Zhiping Mao)*

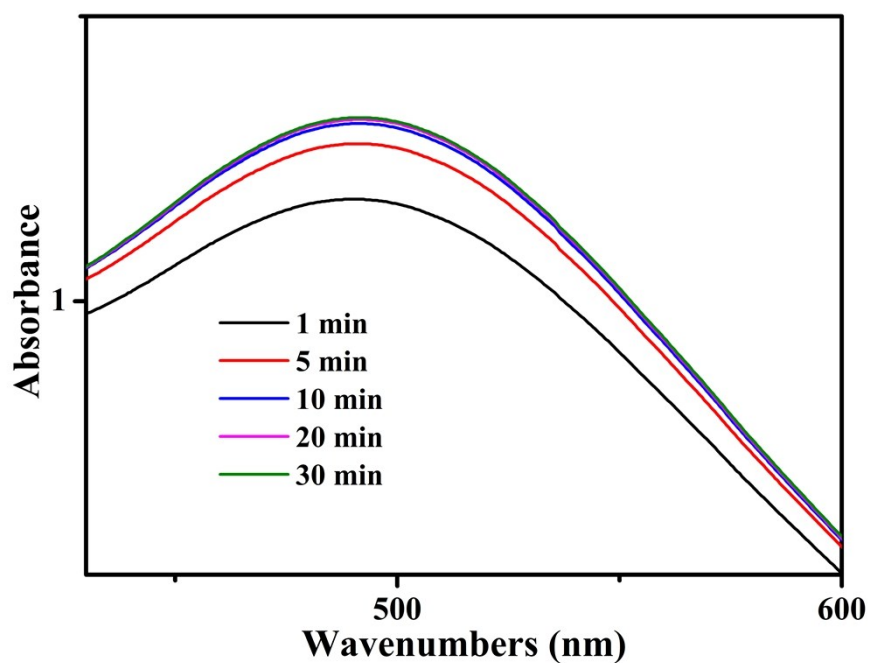

**Fig. S1** The time-dependent UV-Vis study of the PVAA-Fe hydrogel. The spectra of PVAA-Fe recorded 1 min after mixing with  $\text{Fe}^{3+}$  were identical to that after 30 min, which can be ascribed to the extremely fast complexation between the  $\text{Fe}^{3+}$  ions and the PVAA polymer chain.

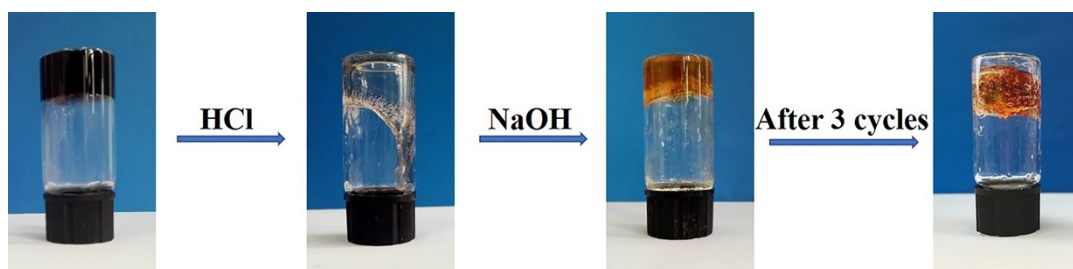

**Fig. S2** Photographs of the reversible gel-sol and sol-gel transitions triggered by HCl and NaOH solution. The hydrogel was exposed to 30  $\mu\text{L}$  of a 4 M aqueous HCl solution, followed by treatment with 30  $\mu\text{L}$  of a 4 M aqueous NaOH solution.

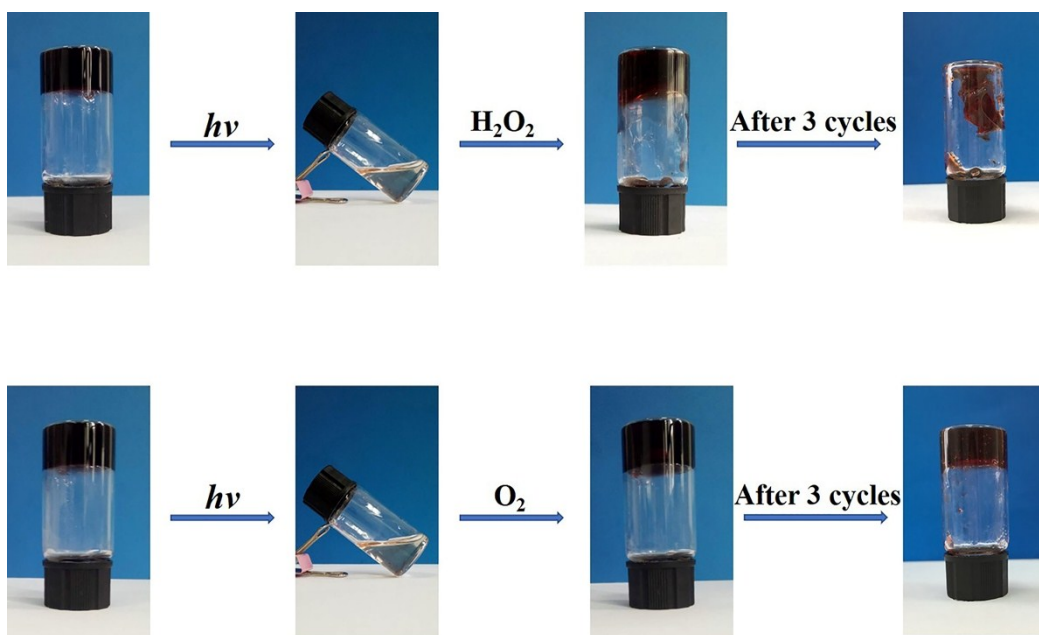

**Fig. S3** The reversible gel-sol transitions triggered by UV light. After ultraviolet light irradiation, the gel was converted into colorless sol. Then, this PVAA solution can be recovered to the homogeneous brown gel again after being exposed to oxygen for three days or being added excessive hydrogen peroxide.

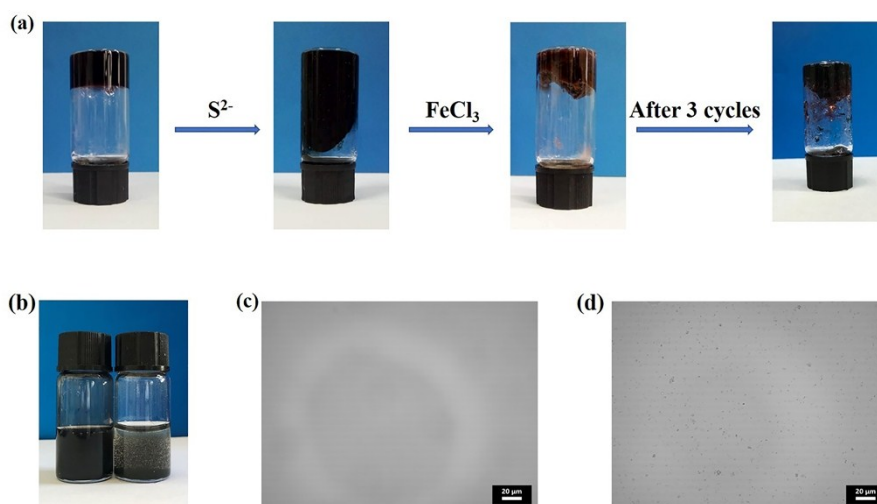

**Fig. S4** (a) The reversible gel-sol and sol-gel transition induced by  $\text{Na}_2\text{S}$ . 60  $\mu\text{L}$  of  $\text{Na}_2\text{S}$  solution (100 mg/mL) was added into 3 g of PVAA-Fe hydrogels, and a dark brown solution was obtained. Gel state could be restored by adding excessive  $\text{Fe}^{3+}$  ions. (b) The photo of PVAA-Fe- $\text{S}^{2-}$  sol (left) and Fe- $\text{S}^{2-}$  solution (right). (c) The image of optical microscope of PVAA-Fe hydrogel. (d) The

image of optical microscope of PVAA-Fe-S<sup>2-</sup> sol.

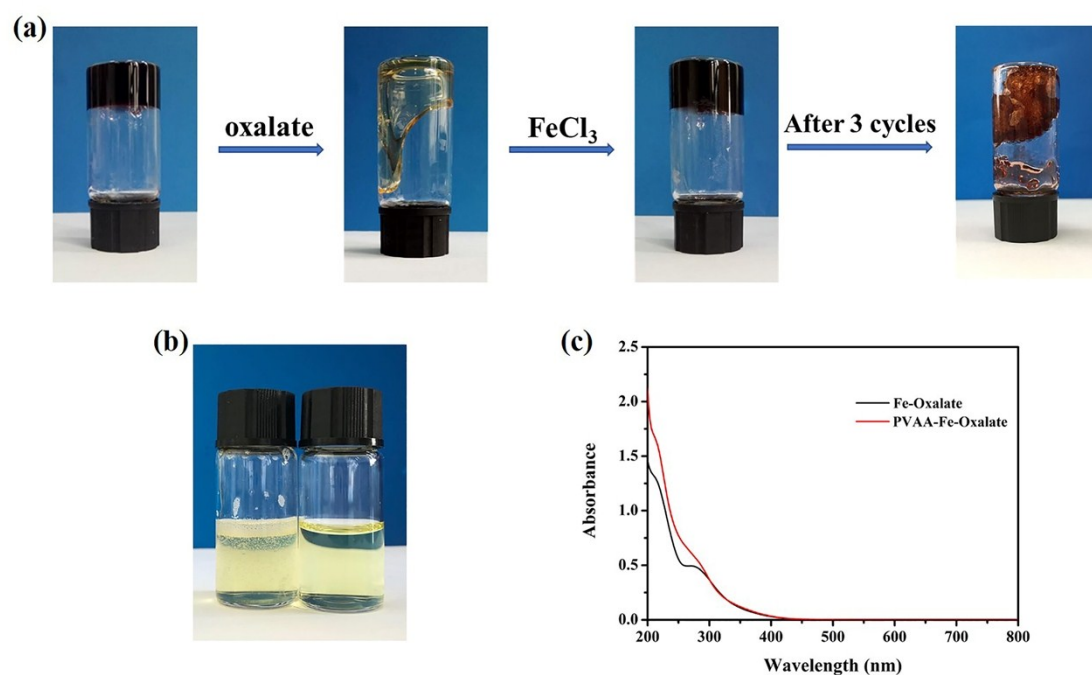

**Fig. S5** (a) The reversible gel-sol transition induced by oxalate. 90  $\mu\text{L}$  of oxalate solution (100 mg/mL) was added into 3 g of PVAA-Fe hydrogels, and a light-yellow solution was obtained. Gel state could be restored by adding excessive  $\text{Fe}^{3+}$  ions. (b) The photo of PVAA-Fe-Oxalate sol (left) and Fe-Oxalate solution (right). (c) The UV/Vis absorption spectra of the PVAA-Fe-Oxalate sol and Fe-Oxalate solution.

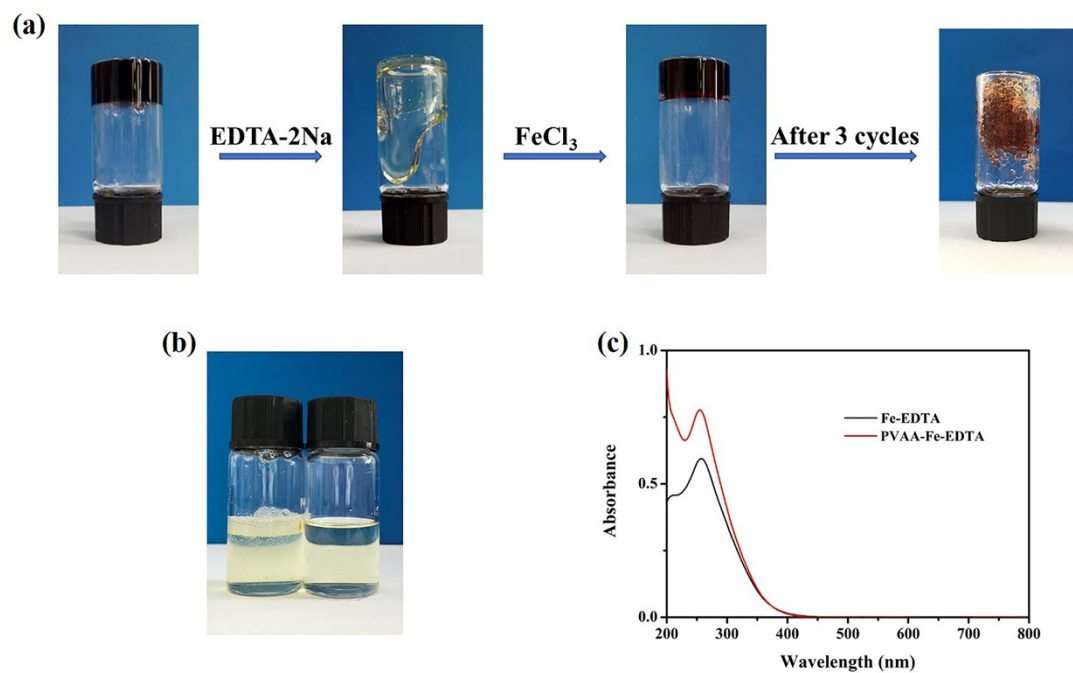

**Fig. S6** (a) The reversible gel-sol transition induced by EDTA. 30 $\mu$ L of EDTA-2Na solution (100 mg/mL) was added into 3 g of PVAA-Fe hydrogels, and a light-yellow solution was obtained. Gel state could be restored by adding excessive Fe<sup>3+</sup> ions. (b) The photo of PVAA-Fe-EDTA sol (left) and Fe-EDTA solution (right). (c) The UV/Vis absorption spectra of the PVAA-Fe-EDTA sol and Fe-EDTA solution.

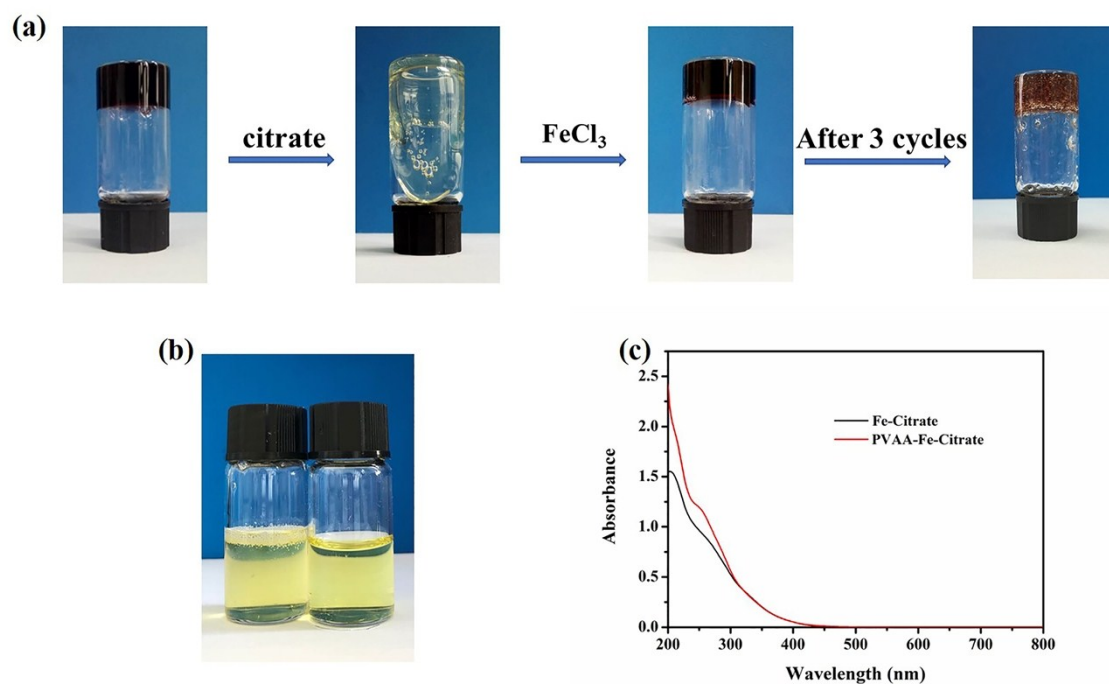

**Fig. S7** (a) The reversible gel-sol transition induced by. 30  $\mu\text{L}$  of citric acid radical solution (100 mg/mL) was added into 3 g of PVAA-Fe hydrogels, and a light-yellow solution was obtained. Gel state could be restored by adding excessive  $\text{Fe}^{3+}$  ions. (b) The photo of PVAA-Fe-Citrate sol (left) and Fe-Citrate solution (right). (c) The UV/Vis absorption spectra of the PVAA-Fe-Citrate sol and Fe-Citrate solution.

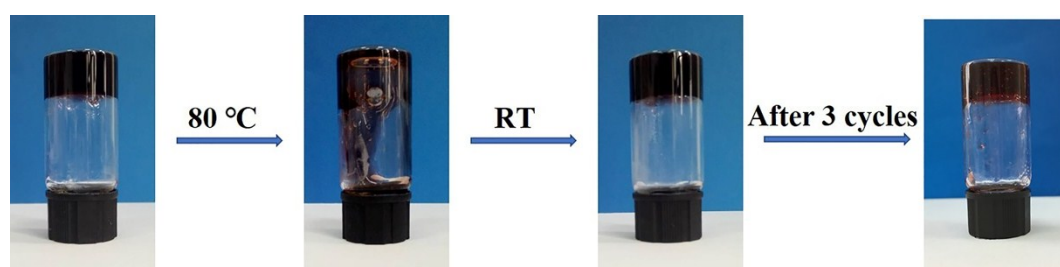

**Fig. S8** The reversible gel-sol transitions triggered by raising the temperature to 80  $^{\circ}\text{C}$ . Then, the PVAA solution can be recovered to the homogeneous brown gel again after being placed at room temperature.

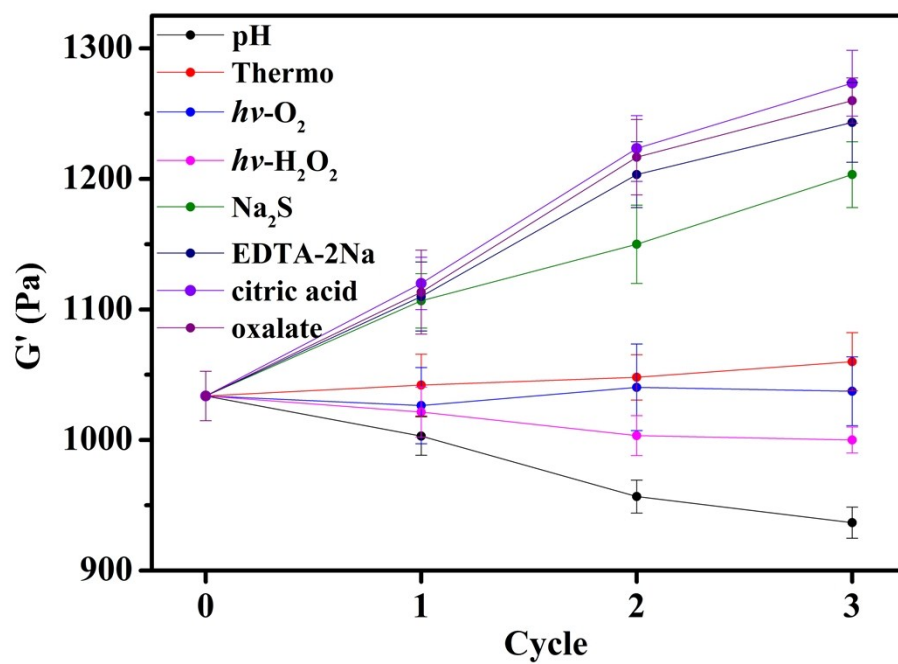

**Fig. S9** Rheology analyses of the storage modulus  $G'$  on time sweep (25 °C, strain = 1%, frequency = 1 Hz) for different responsive process.
